# Supplementary material for: A Generic and Effective System Dispersion Compensation Method: Development and Validation in Visible-Light OCT
Source: MDPI journal article supplement (doi:10.3390/photonics10080892), 2023-08-02
Supplement: s1 [file s1]

## Supplementary Materials

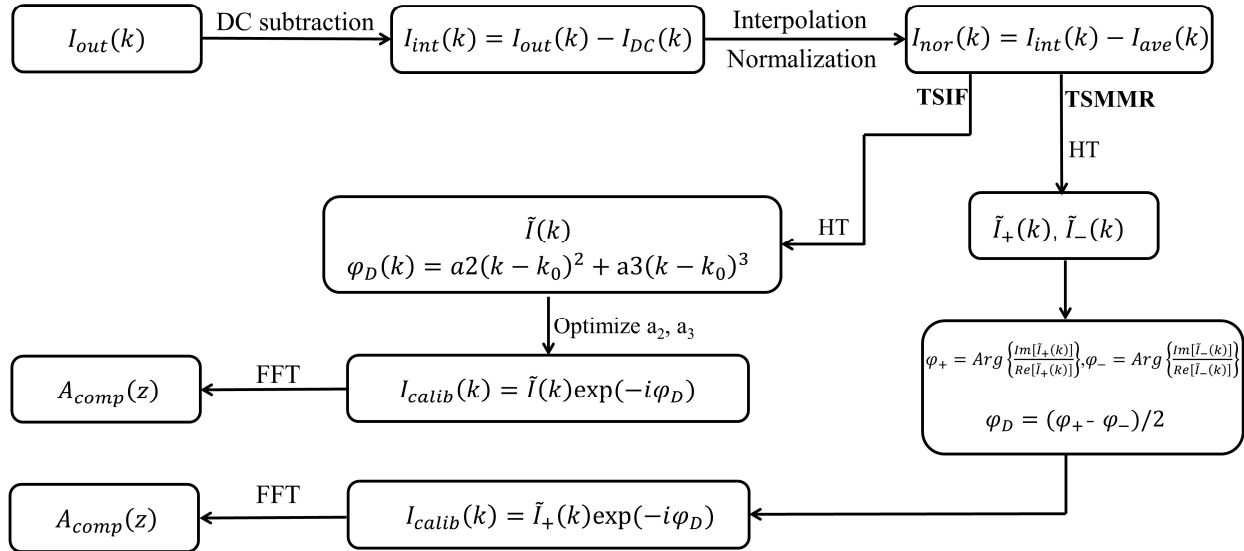

Figure S1 The calculation flowchart of TSIF method and TSMMR method.

**Supplementary Note S1:** We used the amplitudes of two symmetric first side lobes of PSF as the indicator for the symmetrical property, which is defined as following:

$$S = \sum_{n=1}^{n=Z/\Delta z} |A(z_p + n \cdot \Delta z) - A(z_p - n \cdot \Delta z)|$$

where  $z_p - n \cdot \Delta z$  and  $z_p + n \cdot \Delta z$  refer to two symmetrical positions located in the left and right sides of the main peak.  $A(z)$  refers to the amplitude at the corresponding depth  $z$ .  $\Delta z = 0.0257$  presents the increment for one pixel in Figure 3a and b. The used maximal depth  $Z = 20 \mu\text{m}$ . The calculated  $S$  for TSIF, TSMMR and SAMMR is 718, 126 and 79, respectively. The lower  $S$  value in SAMMR indicates more symmetrical side lobes than those in the other two methods.
